# Supplementary material for: Engineering of Vaginal Lactobacilli to Express Fluorescent Proteins Enables the Analysis of Their Mixture in Nanofibers
Source: MDPI journal article supplement (doi:10.3390/ijms222413631), 2021-12-20
Supplement: s1 [file s1]

## Supplementary Material

### Engineering of vaginal lactobacilli to express fluorescent proteins enables the analysis of their mixture in nanofibers

Spase Stojanov<sup>1,2</sup>, Tina Vida Plavec<sup>1</sup>, Julijana Kristl<sup>2</sup>, Špela Zupančič<sup>2</sup>, Aleš Berlec<sup>1,2,\*</sup>

<sup>1</sup> Department of Biotechnology, Jožef Stefan Institute, Ljubljana, Slovenia

<sup>2</sup> Faculty of Pharmacy, University of Ljubljana, Ljubljana, Slovenia

\*Correspondence: [ales.berlec@ijs.si](mailto:ales.berlec@ijs.si)

**Table S1.** Coefficients of determination ( $R^2$ ) and slopes of the linear regression lines. The differences between slopes were determined to be significant in all 16 graphs.

| Species             | Plasmid                   | Transformed     |                             |              |                             | Nontransformed |                              |
|---------------------|---------------------------|-----------------|-----------------------------|--------------|-----------------------------|----------------|------------------------------|
|                     |                           | Without shaking |                             | With shaking |                             | With shaking   |                              |
|                     |                           | $R^2$           | Slope                       | $R^2$        | Slope                       | $R^2$          | Slope                        |
| <i>L. plantarum</i> | pNZ- <i>ldh</i> -IRFP     | 0.9981          | $(3.4 \pm 0.1) \times 10^2$ | 0.9994       | $(3.7 \pm 0.0) \times 10^3$ | 0.01649        | $(0.6 \pm 1.6) \times 10^0$  |
|                     | pNZ- <i>ldh</i> -GFP      | 0.9869          | $(1.1 \pm 0.0) \times 10^4$ | 0.9898       | $(1.3 \pm 0.0) \times 10^4$ | 0.3166         | $(8.7 \pm 4.5) \times 10^0$  |
|                     | pNZ- <i>ldh</i> -mCherry  | 0.9894          | $(1.2 \pm 0.0) \times 10^4$ | 0.9974       | $(1.4 \pm 0.0) \times 10^4$ | 0.01993        | $(-1.2 \pm 3.1) \times 10^0$ |
|                     | pNZ- <i>ldh</i> -mTagBFP2 | 0.9564          | $(7.9 \pm 0.6) \times 10^3$ | 0.9984       | $(1.3 \pm 0.0) \times 10^4$ | 0.9964         | $(2.9 \pm 0.1) \times 10^3$  |
| <i>L. gasseri</i>   | pNZ- <i>ldh</i> -IRFP     | 0.9810          | $(8.4 \pm 0.4) \times 10^1$ | 0.9985       | $(2.9 \pm 0.0) \times 10^2$ | 0.0362         | $(-0.5 \pm 1.0) \times 10^0$ |
|                     | pNZ- <i>ldh</i> -GFP      | 0.9929          | $(7.4 \pm 0.2) \times 10^3$ | 0.9928       | $(1.4 \pm 0.0) \times 10^4$ | 0.9961         | $(5.1 \pm 0.1) \times 10^1$  |
|                     | pNZ- <i>ldh</i> -mCherry  | 0.9798          | $(2.1 \pm 0.1) \times 10^3$ | 0.9972       | $(5.7 \pm 0.1) \times 10^3$ | 0.6565         | $(6.3 \pm 1.6) \times 10^0$  |

|                     |                           |        |                             |        |                             |        |                             |
|---------------------|---------------------------|--------|-----------------------------|--------|-----------------------------|--------|-----------------------------|
|                     | pNZ- <i>ldh</i> -mTagBFP2 | 0.9908 | $(7.7 \pm 0.2) \times 10^3$ | 0.9611 | $(1.5 \pm 0.1) \times 10^4$ | 0.9996 | $(2.1 \pm 0.0) \times 10^3$ |
| <i>L. crispatus</i> | pNZ- <i>ldh</i> -IRFP     | 0.7996 | $(1.4 \pm 0.2) \times 10^1$ | 0.9732 | $(2.6 \pm 0.1) \times 10^1$ | 0.5713 | $(3.6 \pm 1.1) \times 10^0$ |
|                     | pNZ- <i>ldh</i> -GFP      | 0.9920 | $(8.7 \pm 0.2) \times 10^3$ | 0.9826 | $(1.3 \pm 0.1) \times 10^4$ | 0.9935 | $(1.8 \pm 0.1) \times 10^3$ |
|                     | pNZ- <i>ldh</i> -mCherry  | 0.9638 | $(8.0 \pm 0.5) \times 10^1$ | 0.9885 | $(1.7 \pm 0.1) \times 10^2$ | 0.8497 | $(8.1 \pm 1.2) \times 10^0$ |
|                     | pNZ- <i>ldh</i> -mTagBFP2 | 0.9964 | $(8.5 \pm 0.1) \times 10^3$ | 0.9984 | $(1.3 \pm 0.0) \times 10^4$ | 0.9981 | $(6.2 \pm 0.9) \times 10^2$ |
| <i>L. jensenii</i>  | pNZ- <i>ldh</i> -IRFP     | 0.9943 | $(5.8 \pm 0.2) \times 10^1$ | 0.9891 | $(6.5 \pm 0.2) \times 10^1$ | 0.0038 | $(0.1 \pm 0.8) \times 10^0$ |
|                     | pNZ- <i>ldh</i> -GFP      | 0.9983 | $(7.5 \pm 0.1) \times 10^3$ | 0.9983 | $(1.4 \pm 0.0) \times 10^4$ | 0.9992 | $(2.7 \pm 0.0) \times 10^2$ |
|                     | pNZ- <i>ldh</i> -mCherry  | 0.9751 | $(3.6 \pm 0.2) \times 10^2$ | 0.9854 | $(6.8 \pm 0.2) \times 10^2$ | 0.4361 | $(5.4 \pm 2.2) \times 10^0$ |
|                     | pNZ- <i>ldh</i> -mTagBFP2 | 0.9927 | $(1.2 \pm 0.0) \times 10^4$ | 0.9882 | $(1.4 \pm 0.1) \times 10^4$ | 0.9994 | $(5.0 \pm 0.0) \times 10^2$ |

**Table S2.** Primers used in this study.

| Primer name    | Primer sequence (5'-3')                      |
|----------------|----------------------------------------------|
| ldh-F          | AGATCTTCCAACATTATGACG                        |
| ldh-IRFP-R     | GCTACAGATCCCTCAGCCATAATAAGTCATCCTCTCGTAG     |
| ldh-mCherry-R  | TCTTCACCCTTTGATACCATAATAAGTCATCCTCTCGTAG     |
| ldh-mTagBFP2-R | CTCCTTAATCAGCTCGCTCATAATAAGTCATCCTCTCGTAG    |
| IRFP-ldh-F     | CTACGAGAGGATGACTTATTATGGCTGAGGGATCTGTAGC     |
| mCherry-ldh-F  | CTACGAGAGGATGACTTATTATGGTATCAAAGGGTGAAGAAG   |
| mTagBFP2-ldh-F | CTACGAGAGGATGACTTATTATGAGCGAGCTGATTAAGGAGAAC |
| IRFP-R         | TCTAGATTATTCTTCCATTACACCAATTTGC              |
| mCherry-R      | TCTAGATTATCACTGTATAATTCATCC                  |
| mTagBFP2-R     | TTTATCTAGATTAATTAAGCTTGTGCCCCAGTTTGC         |

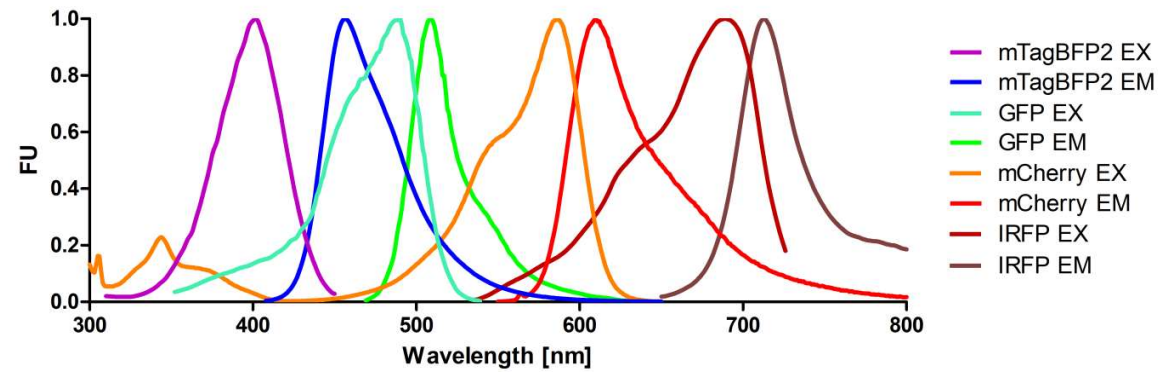

**Figure S1.** The excitation (EX) and emission (EM) spectra of fluorescent proteins mTagBFP2, GFP, mCherry and IRFP. The data was obtained from FPbase (Lambert, 2019).

#### Supplementary references:

1. Lambert, T.J. FPbase: a community-editable fluorescent protein database. *Mat Meth* **2019**, 16, 277-278. doi:10.1038/s41592-019-0352-8.
